# Supplementary material for: Exciton tuning in monolayer WSe2viasubstrate induced electron doping
Source: Royal Society of Chemistry journal article supplement (doi:10.1039/d2na00495j), 2022-01-01
Supplement: d2na00495j1.pdf [file d2na00495j1.pdf]

## Supplementary information: Exciton tuning in monolayer WSe<sub>2</sub> via substrate induced electron doping

Yang Pan<sup>1,2\*</sup>, Mahfujur Rahaman<sup>3</sup>, Lu He<sup>1,2</sup>, Ilya Milekhin<sup>1,2</sup>, Gopinath Manoharan<sup>4</sup>, Muhammad Awais Aslam<sup>5</sup>, Thomas Blaudeck<sup>2,4,6</sup>, Andreas Willert<sup>6</sup>, Aleksandar Matković<sup>5</sup>, Teresa I. Madeira<sup>1,2</sup>, and Dietrich R. T. Zahn<sup>1,2</sup>

<sup>1</sup>Semiconductor Physics, Institute of Physics, Chemnitz University of Technology, Chemnitz, Germany

<sup>2</sup>Center for Materials, Architectures, and Integration of Nanomembranes (MAIN), Chemnitz University of Technology, Chemnitz, Germany

<sup>3</sup>Department of Electrical and Systems Engineering, University of Pennsylvania, Philadelphia, PA, USA

<sup>4</sup>Center for Microtechnologies, Chemnitz University of Technology, Chemnitz, Germany

<sup>5</sup>Institute of Physics, Montanuniversität Leoben, Leoben, Austria

<sup>6</sup>Fraunhofer Institute for Electronic Nano Systems, Chemnitz, Germany

\*Corresponding author: yang.pan@physik.tu-chemnitz.de

### 1 Sample preparation

#### 1.1 WSe<sub>2</sub>/hBN/HOPG hetero-stack

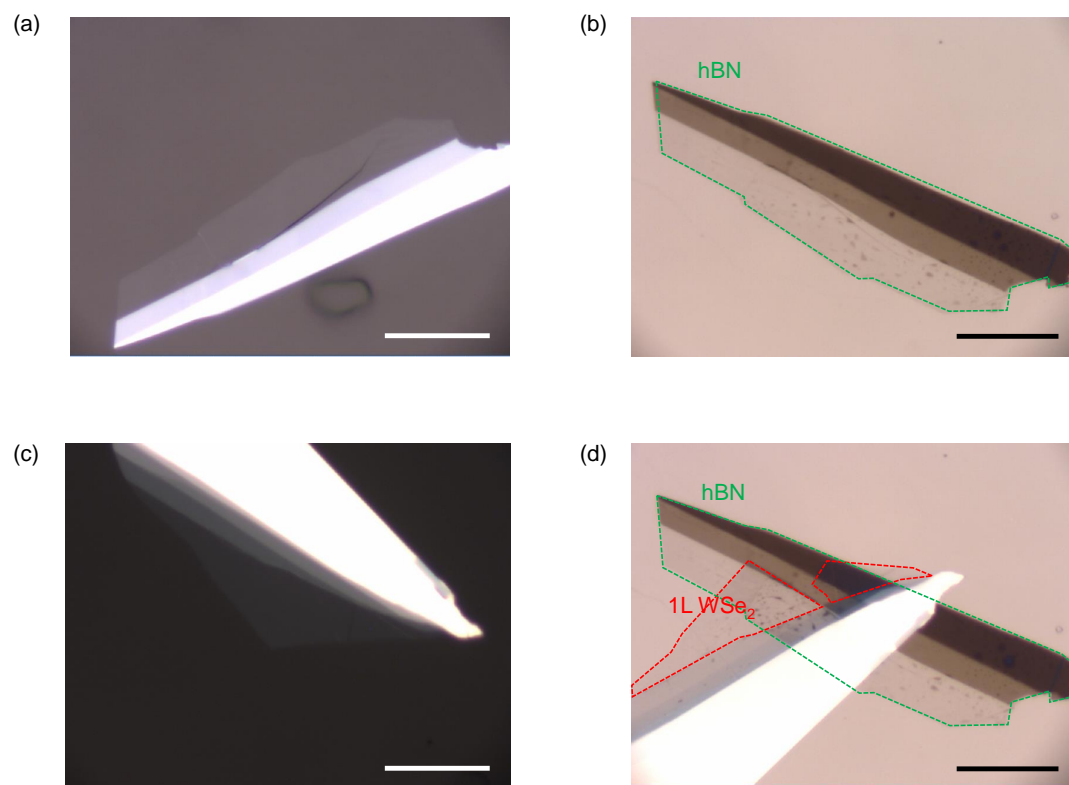

Figure 1S: Optical microscope images of few layer hBN on (a) PDMS, (b) HOPG and monolayer WSe<sub>2</sub> on (c) PDMS, (d) hBN/HOPG. Scale bar in figure is 20  $\mu\text{m}$ .

Monolayer WSe<sub>2</sub> and few layer hBN are mechanical exfoliated from their bulk materials via Nitto tape on PDMS stamp (as shown in Fig. 1S (a) and (c)). WSe<sub>2</sub> is firstly characterized by PL and Raman spectroscopy to identify the layer numbers before transfer. After confirming the layer numbers, the HOPG top layer is cleaved to ensure a clean surface. The hBN and WSe<sub>2</sub> are immediately transferred bottom-to-top with a all-dry deterministic transfer technique[1].

## 1.2 WSe<sub>2</sub>/graphene/hBN/HOPG hetero-stack

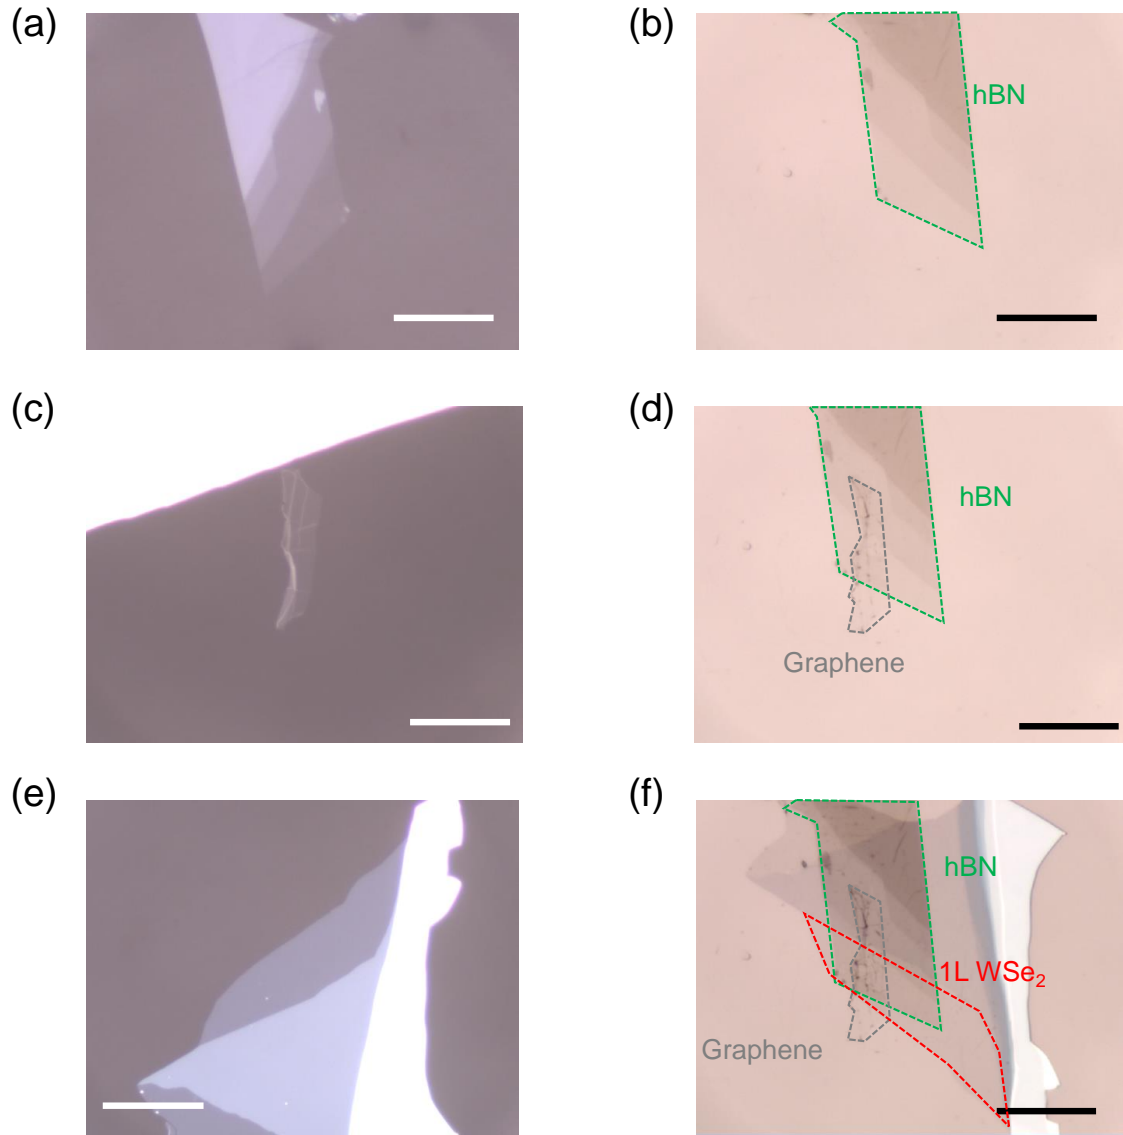

Figure 2S: Optical microscope images of few layer hBN on (a) PDMS, (b) HOPG, graphene on (c) PDMS, (d) hBN/HOPG and monolayer WSe<sub>2</sub> on (e) PDMS, (f) graphene/hBN/HOPG. Scale bar in figure is 20 μm.

The sample preparation procedure is same as mentioned above.

## 2 Stokes shift of monolayer WSe<sub>2</sub>

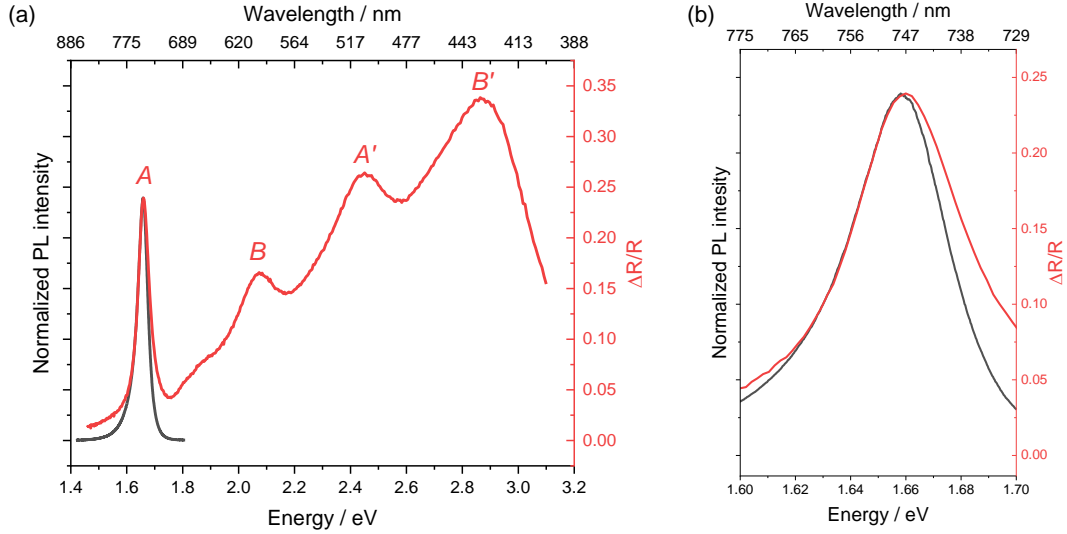

Figure 3S: (a) Micro PL and micro reflectance contrast spectra of monolayer WSe<sub>2</sub>. (b) zoomed in for 1.60-1.70 eV.

Micro reflectance contrast measurements are carried out with a Zeiss AxioImager.M2m microscope in epi-illumination configuration equipped with a 50x, 0.75NA objective, a Zeiss HAL 100 illuminator-12 V/ 100W white-light source with intensity control and coupled to a J&M Analytik AG Tidas S MSP 800 spectrometer operable in the spectral range 200-980 nm [2, 3].

For the ultra-thin film on a transparent substrates,  $\Delta R/R$  is predominantly determined by the imaginary part of the dielectric function, which is proportional to the optical absorption[4–7].

We measured the micro PL and micro reflectance contrast spectra to extract the Stokes shift of monolayer WSe<sub>2</sub> to make sure that it is reasonable to consider the PL peak energy position corresponding to the exciton energy. As shown in Fig. 3S, we only observe a  $\sim 2$  meV Stokes shift, which makes it fair enough to consider the exciton PL peak position as the exciton energy.

## 3 Extended information of the PL maps

### 3.1 Fitting parameters for the PL spectrum

| WSe <sub>2</sub> /hBN/HOPG | Position / meV | FWHM / meV |
|----------------------------|----------------|------------|
| X <sup>0</sup>             | 1647±2         | 37±2       |
| X <sup>T</sup>             | 1615±2         | 57±2       |

| WSe <sub>2</sub> /HOPG | Position / meV | FWHM / meV |
|------------------------|----------------|------------|
| X <sup>0</sup>         | 1585±2         | 42±2       |
| X <sup>T</sup>         | 1549±2         | 46±2       |

Note that the errors from fitting are less than 1 meV, which is well below the measuring limit at room temperature. We measured a Hg-Ar calibration lamp to determine our instrumental broadening and considered the instrumental broadening as the error.

### 3.2 Histogram of the WSe<sub>2</sub>/HOPG/hBN PL map

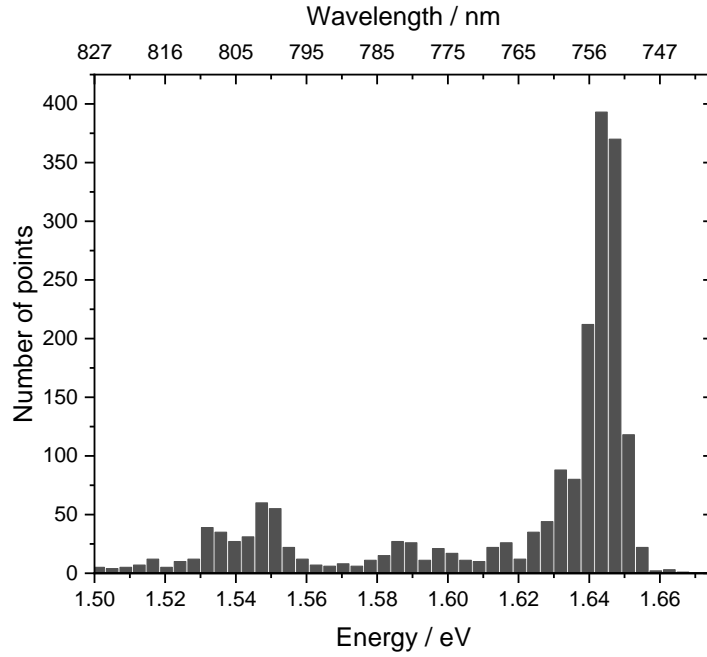

Figure 4S: Histogram of the WSe<sub>2</sub>/hBN/HOPG PL peak position map in figure. 1(b) in the main text.

### 3.3 Effect of bubbles on the PL spectra

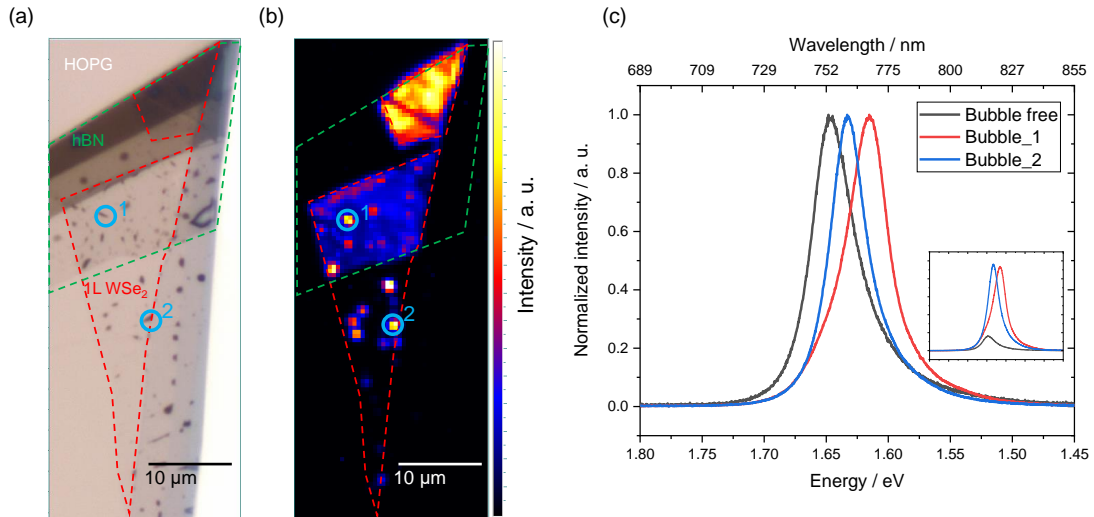

Figure 5S: (a) optical microscope image and (b) PL intensity map of the WSe<sub>2</sub>/hBN/HOPG hetero-stack. (c) Typical PL spectra of the monolayer WSe<sub>2</sub> with and without bubble. Inset: as-measured (not-normalized) PL spectra.

### 3.4 PL map of WSe<sub>2</sub>/graphene/hBN/HOPG hetero-stack

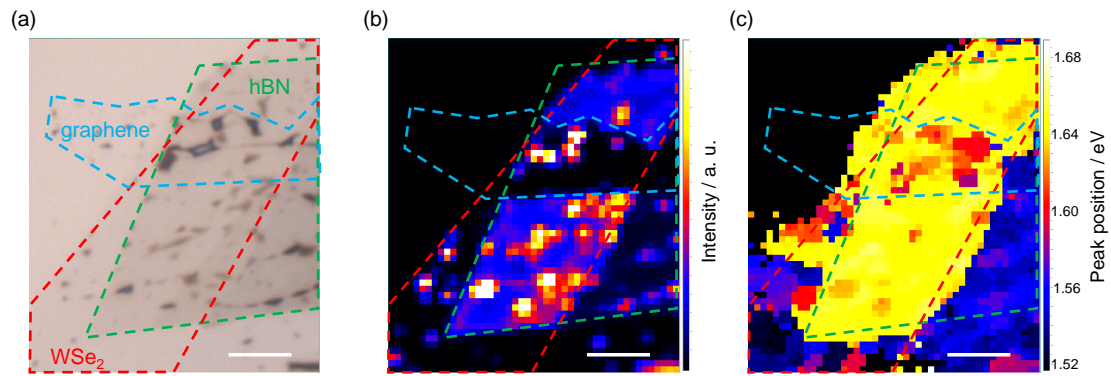

Figure 6S: (a) optical microscope image, (b) PL intensity map and (c) PL peak position map of the WSe<sub>2</sub>/graphene/hBN/HOPG hetero-stack. Scale bar in figure is 5 μm.

## 4 High-resolution Raman spectra

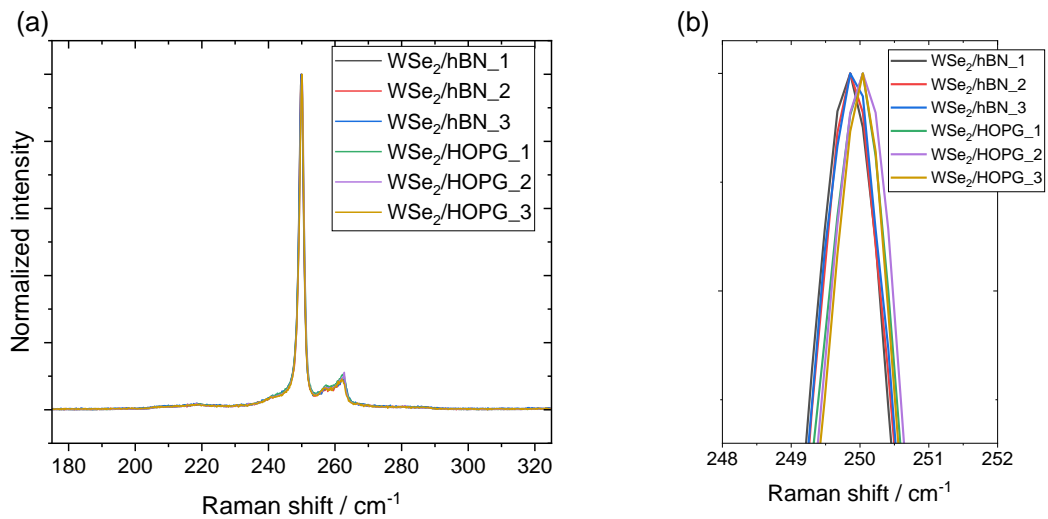

Figure 7S: (a) High-resolution Raman spectra of WSe<sub>2</sub>/hBN and WSe<sub>2</sub>/HOPG. (b) Zoomed in for 248-252 cm<sup>-1</sup>.

## 5 AFM and KPFM

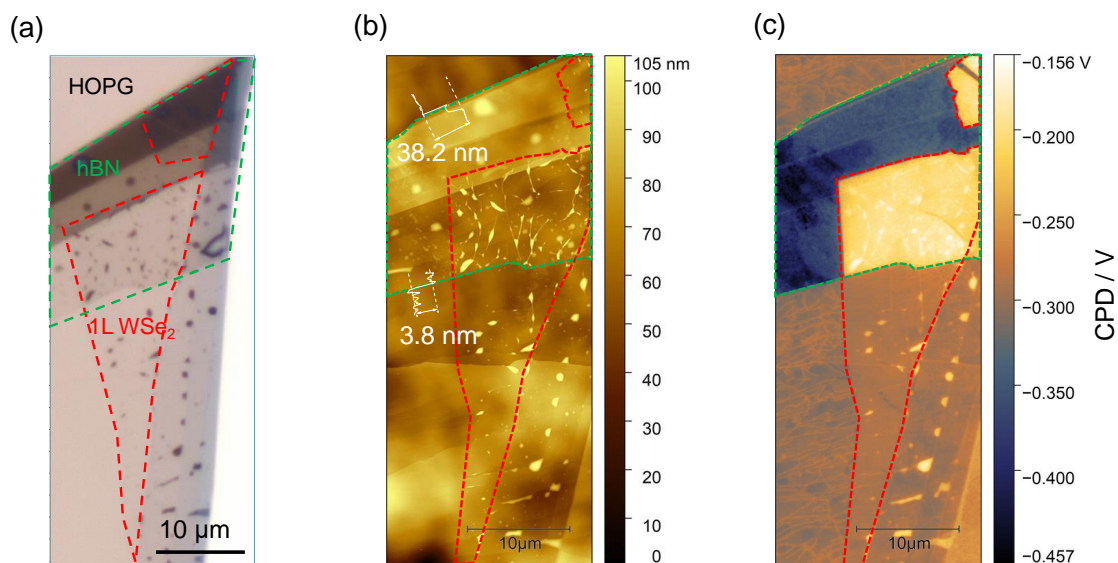

Figure 8S: (a) optical microscope image, (b) AFM height image, and (c) KPFM image of WSe<sub>2</sub>/hBN/HOPG hetero-stack.

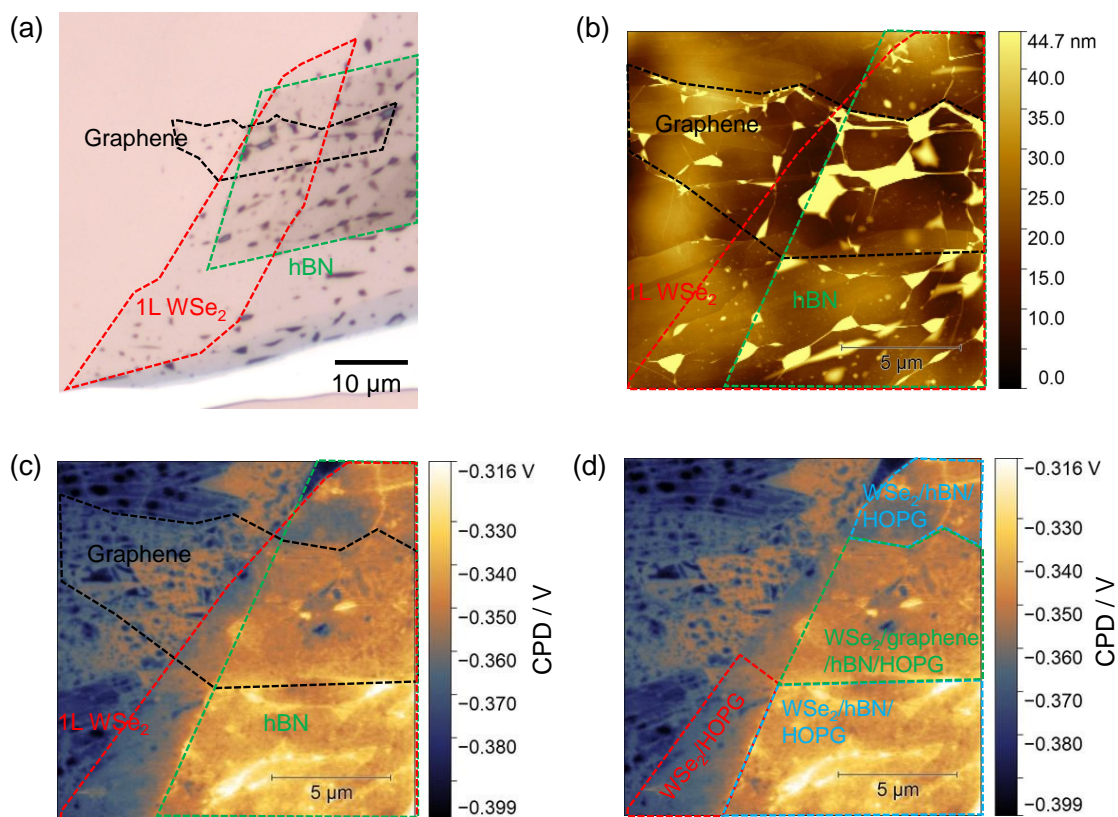

Figure 9S: (a) optical microscope image, (b) AFM height image, and (c-d) KPFM image of WSe<sub>2</sub>/graphene/hBN/HOPG hetero-stack.

## 6 Work function determination of HOPG

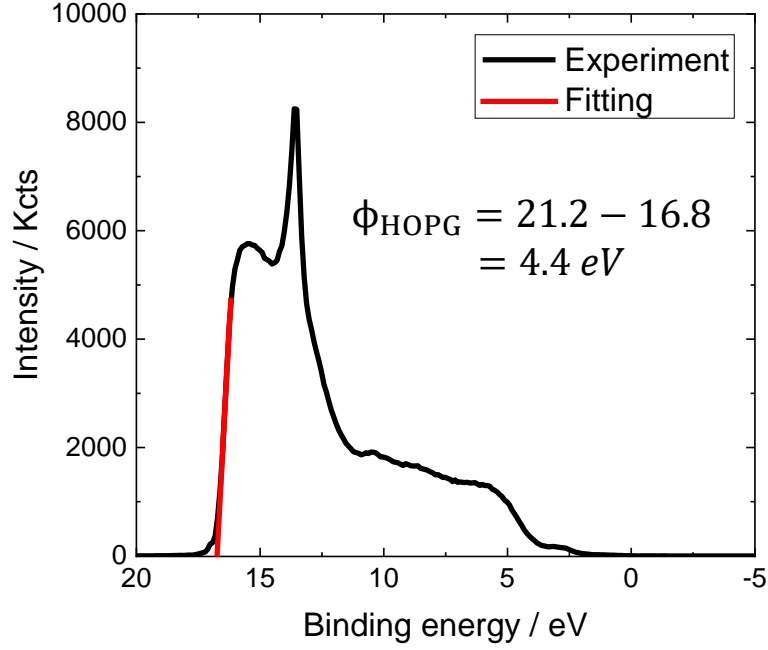

Figure 10S: UPS spectra of HOPG.

We use ultraviolet photoelectron spectroscopy (UPS) to determine the absolute work function of HOPG [8]. The He-I light source has an energy of 21.2 eV and the secondary electron cutoff (SEC) is 16.8 eV. The work function of HOPG is 4.4 eV.

## 7 Mass action model

We estimate the electron concentration using the mass action law associated with trions [9, 10]. In this model the following relation is obtained:

$$\frac{N_X n_e}{N_{X^-}} = \left( \frac{4m_X m_e}{\pi \hbar^2 m_{X^-}} \right) k_B T \exp\left(-\frac{E_b}{k_B T}\right) \quad (1)$$

where  $N_X$  and  $N_{X^-}$  are the exciton and trion population, respectively.  $n_e$  is the electron concentration.  $m_e$  ( $0.48m_0$ ),  $m_X$  ( $0.92m_0$ ), and  $m_{X^-}$  ( $1.40m_0$ ) are the effective mass of electron, exciton, and trion, respectively [11].  $E_b$  (30 meV) is the trion binding energy. The intensity ration of trion to neutral exciton is expressed as:

$$\frac{I_{X^-}}{I_X} = \frac{\gamma_{X^-}}{\gamma_X} \times \frac{N_{X^-}}{N_X} = \frac{\gamma_{X^-}}{\gamma_X} \times \frac{n_e}{\left( \frac{4m_X m_e}{\pi \hbar^2 m_{X^-}} \right) k_B T \exp\left(-\frac{E_b}{k_B T}\right)} \quad (2)$$

where  $\gamma_{X^-}$  and  $\gamma_X$  are the radiative decay rate of trion and exciton. We assume the value of  $\frac{\gamma_{X^-}}{\gamma_X}$  is in the same order of magnitude as what has been reported in Ref. [9], the estimated electron concentration is in the order of  $10^{13} \text{ cm}^{-2}$  when WSe<sub>2</sub> is interfaced with HOPG and is approximately one magnitude smaller when interfaced with hBN or graphene.

## References

1. Castellanos-Gomez, A. *et al.* Deterministic transfer of two-dimensional materials by all-dry viscoelastic stamping. *2D Materials* **1**, 011002 (2014).
2. Sowade, E., Blaudeck, T. & Baumann, R. R. Self-assembly of spherical colloidal photonic crystals inside inkjet-printed droplets. *Crystal Growth & Design* **16**, 1017–1026 (2016).
3. Kuhn, E. *et al.* Disorder explains dual-band reflection spectrum in spherical colloidal photonic supraparticle assemblies. *Nano Select* **2**, 2461–2472 (2021).
4. Raja, A. *et al.* Coulomb engineering of the bandgap and excitons in two-dimensional materials. *Nature communications* **8**, 1–7 (2017).
5. Li, Y. *et al.* Measurement of the optical dielectric function of monolayer transition-metal dichalcogenides: MoS<sub>2</sub>, MoSe<sub>2</sub>, WS<sub>2</sub>, and WSe<sub>2</sub>. *Physical Review B* **90**, 205422 (2014).
6. Zhao, W. *et al.* Evolution of electronic structure in atomically thin sheets of WS<sub>2</sub> and WSe<sub>2</sub>. *ACS nano* **7**, 791–797 (2013).
7. McIntyre, J. & Aspnes, D. E. Differential reflection spectroscopy of very thin surface films. *Surface Science* **24**, 417–434 (1971).
8. Kim, J. W. & Kim, A. Absolute work function measurement by using photoelectron spectroscopy. *Current Applied Physics* **31**, 52–59 (2021).
9. Mouri, S., Miyauchi, Y. & Matsuda, K. Tunable photoluminescence of monolayer MoS<sub>2</sub> via chemical doping. *Nano letters* **13**, 5944–5948 (2013).
10. Ross, J. S. *et al.* Electrical control of neutral and charged excitons in a monolayer semiconductor. *Nature communications* **4**, 1–6 (2013).
11. Rasmussen, F. A. & Thygesen, K. S. Computational 2D materials database: electronic structure of transition-metal dichalcogenides and oxides. *The Journal of Physical Chemistry C* **119**, 13169–13183 (2015).
